# Supplementary material for: Identification and biosynthesis of tropone derivatives and sulfur volatiles produced by bacteria of the marine Roseobacter clade
Source: Royal Society of Chemistry journal article supplement (doi:10.1039/b909133e), 2009-11-12
Supplement: b909133e.pdf [file b909133e.pdf]

## Supporting information

# Identification and biosynthesis of tropone derivatives and sulfur volatiles produced by bacteria of the marine *Roseobacter* clade

Verena Thiel,<sup>a</sup> Thorsten Brinkhoff,<sup>b</sup> Jeroen Dickschat,<sup>a</sup> Susanne Wickel,<sup>a</sup> Jörg Grunenberg,<sup>a</sup> Irene Wagner-Döbler,<sup>c</sup> Meinhard Simon<sup>b</sup> and Stefan Schulz<sup>\*a</sup>

<sup>a</sup>*Institut für Organische Chemie, Technische Universität Braunschweig, Hagenring 30, 38106 Braunschweig, Germany. E-Mail: [stefan.schulz@tu-bs.de](mailto:stefan.schulz@tu-bs.de); Fax: +49-531-391-5272; Tel: +49-531-391-5271*

<sup>b</sup>*Institut für Chemie und Biologie des Meeres, Universität Oldenburg, Carl-von-Ossietzky-Strasse 9-11, 26111 Oldenburg, Germany*

<sup>c</sup>*Helmholtz-Zentrum für Infektionsforschung, Inhoffenstr. 7, 38124 Braunschweig, Germany.*

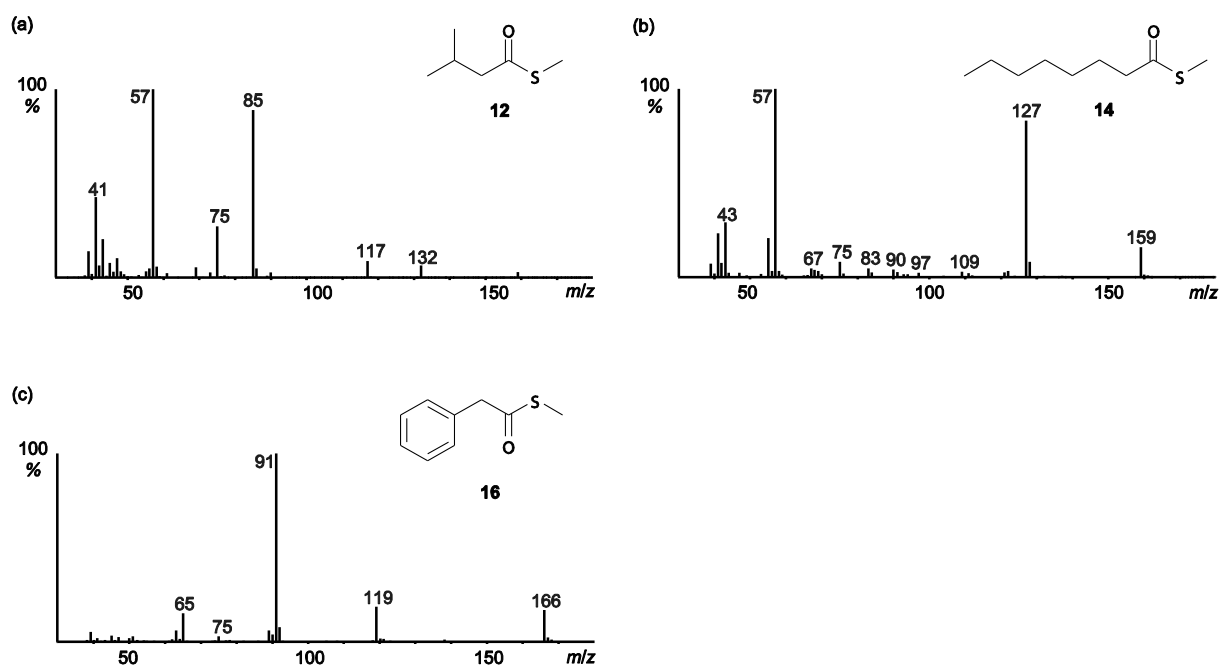

**Fig. S1** Mass spectra of natural (a) *S*-methyl 3-methylbutanethioate (**12**), (b) *S*-methyl octanethioate (**14**), and (c) *S*-methyl 2-phenylethanethioate (**16**). The mass spectra of the synthetic material were identical.

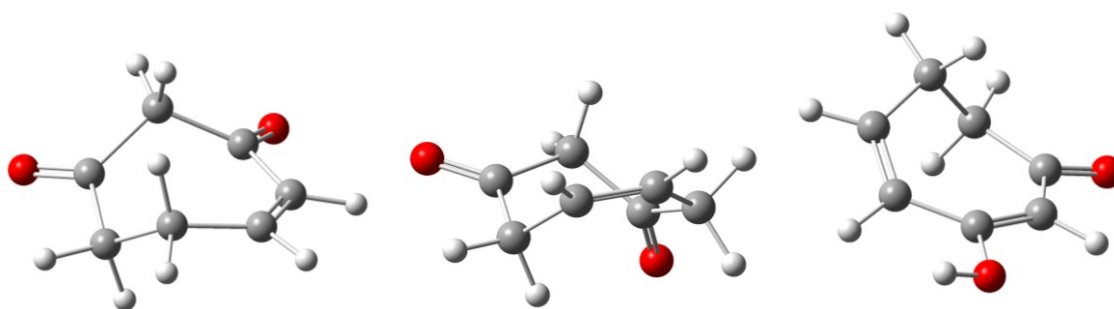

**Fig. S2** Optimized gas phase structures of tautomers **42a-c** (M05-2X).

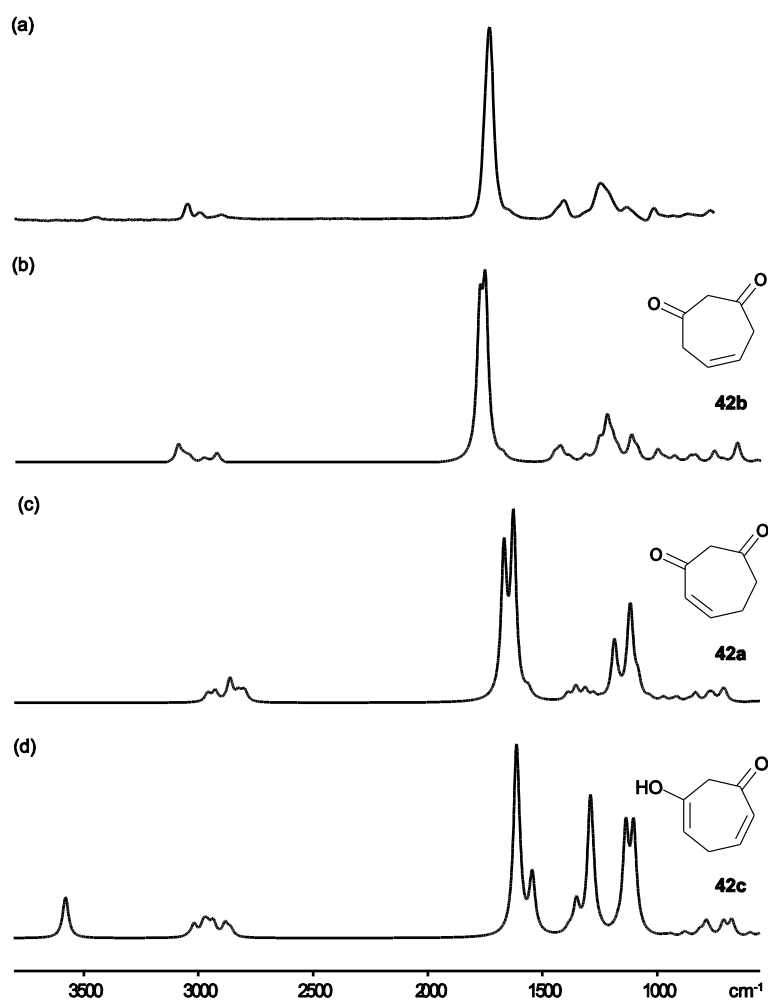

**Fig. S3** Gas phase FT-IR spectrum of natural **42** (a) and calculated gas phase IR-spectra of the three most stable tautomers **42a** (c), **42b** (b), and **42c** (d). The experimental spectrum is most similar to tautomer **42b**.
